# Supplementary material
Source: PubMed Central journal article supplement (PMC4958226)
Supplement: AAC.00774-16_zac008165379so1.pdf [file AAC.00774-16_zac008165379so1.pdf]

## Supplemental Materials: Table S1 and Figure S1

Table S1 Antibacterial drug susceptibility profiles, plasmid characteristics and resistance genes of *E. coli* A31-12 and its transconjugant.

|                                                                 | <i>E. coli</i> A31-12                                                                                                 | <i>E. coli</i> C600                            |         |
|-----------------------------------------------------------------|-----------------------------------------------------------------------------------------------------------------------|------------------------------------------------|---------|
|                                                                 |                                                                                                                       | Transconjugants A31-12T                        | Parent  |
| <b>Antibiotic MIC, in µg/mL (interpretation)<sup>a</sup></b>    |                                                                                                                       |                                                |         |
| Colistin                                                        | 8(R)                                                                                                                  | 4                                              | 0.0625  |
| Ceftazidime                                                     | 16(R)                                                                                                                 | 4                                              | 0.03    |
| Cefotaxime                                                      | 128(R)                                                                                                                | 32                                             | 0.125   |
| Cefoxitin                                                       | 8(S)                                                                                                                  | 1                                              | 1       |
| Ceftiofur <sup>b</sup>                                          | 128(R)                                                                                                                | 16                                             | 0.5     |
| Ciprofloxacin                                                   | 64(R)                                                                                                                 | 0.03                                           | 0.015   |
| Meropenem                                                       | 0.03(S)                                                                                                               | 0.03                                           | 0.03    |
| Nalidixic acid                                                  | >256 (R)                                                                                                              | 1                                              | 2       |
| Olaquinox <sup>c</sup>                                          | 32(S)                                                                                                                 | 8                                              | 8       |
| Doxycycline                                                     | 1(S)                                                                                                                  | 0.5                                            | 0.5     |
| Chloramphenicol                                                 | 64(R)                                                                                                                 | 1                                              | 1       |
| Florfenicol <sup>b</sup>                                        | 256(R)                                                                                                                | 2                                              | 1       |
| Amikacin                                                        | >256(R)                                                                                                               | 1                                              | 1       |
| Gentamicin                                                      | >256(R)                                                                                                               | 1                                              | 1       |
| Streptomycin                                                    | 8(S)                                                                                                                  | >256                                           | >256    |
| Fosfomycin <sup>d</sup>                                         | 128(I)                                                                                                                | 2                                              | 0.5     |
| Trimethoprim/sulfamethoxazole                                   | >16/304(R)                                                                                                            | 0.5/9.5                                        | 0.5/9.5 |
| <b>Resistance genes (genetic background or characteristics)</b> | <i>mcr-1</i> ,<br><i>bla</i> <sub>CTX-M-55</sub> ,<br><i>aac</i> (6')-Ib-<br><i>cr</i> , <i>armA</i> ,<br><i>floR</i> | <i>mcr-1</i><br><i>bla</i> <sub>CTX-M-55</sub> | NA      |
| <b>MLST</b>                                                     | ST1011                                                                                                                | NA                                             | NA      |

MIC: minimum inhibitory concentration; R: resistant; I: intermediate; S: susceptible;

MLST: multilocus sequence typing.

<sup>a</sup> According to Clinical and Laboratory Standards Institute (CLSI) criteria.

<sup>b</sup> Ceftiofur and florfenicol were followed the veterinary CLSI.

<sup>c</sup> Olaquinox was followed the DANMAP 98.

<sup>d</sup> Agar dilution using agar media supplemented with 25 u g/mL of glucose-6-phosphate.

Figure S1. Southern blot hybridization on S1 nuclease-pulsed-field gel electrophoresis gels using specific probes: (b) *mcr-1*, (c) *bla*<sub>CTX-M-55</sub>. The sequence of the primers used to make probes: CLR5-F (5'-CGG TCA GTC CGT TTG TTC-3') and CLR5-R (5'-CTT GGT CGG TCT GTA GGG-3') for *mcr-1*; *bla*<sub>CTX-M-1G</sub>-F (5'-CGC TTT GCG ATG TGC AG-3') and *bla*<sub>CTX-M-1G</sub>-R (5'-ACC GCG ATA TCG TTG GT-3') for *bla*<sub>CTX-M-55</sub>. Lane 1 is transconjugant A31-12T; Lane 2 is donor clinical strain A31-12; M, Salmonella H9812 (20.5-1135kb).

(a)

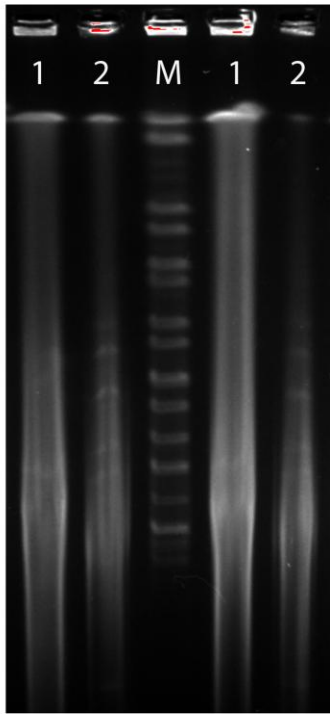

(b)

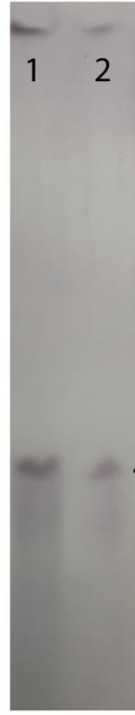

→ *mcr-1*

(c)

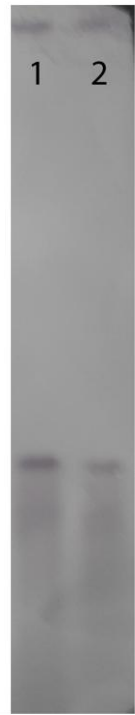

→ *bla*<sub>CTX-M-55</sub>
